# Supplementary material for: Polyethylenimine-functionalized graphene quantum dots for Cd2+ ion adsorption
Source: Royal Society of Chemistry journal article supplement (doi:10.1039/d3nj04680j), 2023-01-01
Supplement: d3nj04680j1.pdf [file d3nj04680j1.pdf]

## **Polyethylenimine Functionalized Graphene Quantum Dots for Cd<sup>2+</sup> ions Adsorption**

*Wenyi Lu<sup>1,\*\*</sup>, Ning Shen<sup>1,\*\*</sup>, Christian Celia<sup>1,2,3</sup>, Yijun Xie<sup>1</sup>, Qing Chang<sup>1,\*</sup>, Xiaoyong Deng<sup>1,\*</sup>*

1. Institute of Nanochemistry and Nanobiology, School of Environmental and Chemical Engineering, Shanghai University, Shanghai 200444, P.R. China.

2. Department of Pharmacy, University of Chieti – Pescara “G. d’Annunzio”, Via dei Vestini 31, I-66100, Chieti, Italy.

3. Laboratory of Drug Targets Histopathology, Institute of Cardiology, Lithuanian University of Health Sciences, A. Mickeviciaus g. 9, LT-44307, Kaunas, Lithuania.

\*\* Wenyi Lu and Ning Shen contributed equally to this work.

\* Co-corresponding authors. E-mail: [qingchang@shu.edu.cn](mailto:qingchang@shu.edu.cn) (Qing Chang) and [xydeng@shu.edu.cn](mailto:xydeng@shu.edu.cn) (Xiaoyong Deng).

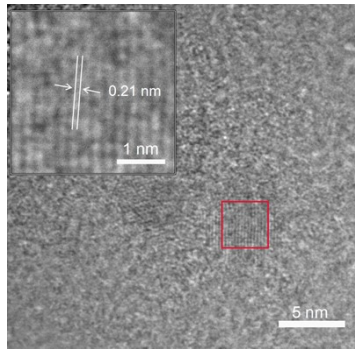

Fig. S1 HRTEM images of graphene quantum dots

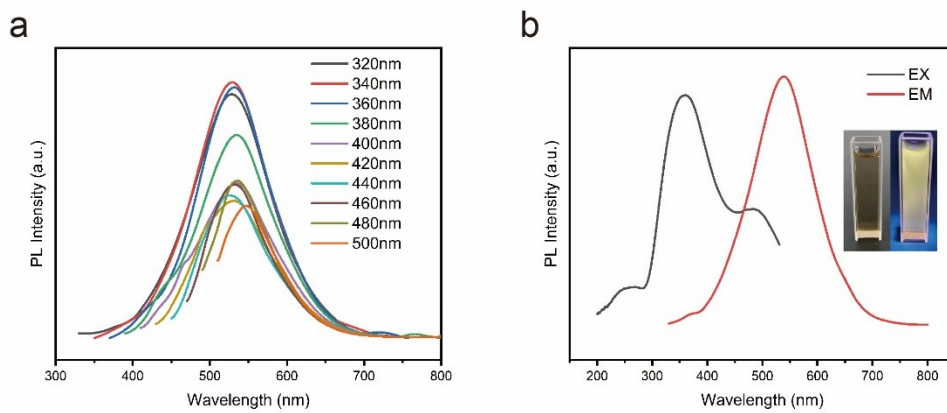

Fig. S2 (a) Fluorescence emission spectra of GQDs with different excitation wavelengths from 320 nm to 500 nm. (b) excitation and emission spectra of GQDs, inset: images of GQDs aqueous solutions under daylight (left) and UV (right).

Table S1 Thermogravimetric data analysis table

| Sample                     | GQDs<br>(mg) | PEI<br>(mg) | Molar ratio<br>(GQD:PEI) | PEI doping ratio (%) |    |
|----------------------------|--------------|-------------|--------------------------|----------------------|----|
| GQDs-PEI <sub>(600)</sub>  | 10           | 100         | 1:10                     | <del>41</del>        | 43 |
| GQDs-PEI <sub>(600)</sub>  | 10           | 150         | 1:15                     | <del>49</del>        | 45 |
| GQDs-PEI <sub>(600)</sub>  | 10           | 200         | 1:20                     | <del>55</del>        | 49 |
| GQDs-PEI <sub>(1800)</sub> | 10           | 200         | 1:20                     | <del>54</del>        | 48 |
